# Supplementary material for: Control of Vein-Forming, Striped Gene-Expression by Auxin Signaling
Source: bioRxiv or medRxiv preprint supplement (doi:10.1101/2020.09.28.317644), 2020-09-30

SUPPLEMENTAL TABLES

Table S1. Origin and Nature of Lines

| LINE            | ORIGIN / NATURE                                                                                                                                                                                                                                               |
|-----------------|---------------------------------------------------------------------------------------------------------------------------------------------------------------------------------------------------------------------------------------------------------------|
| <i>athb8-11</i> | ABRC (CS6969); (Prigge et al., 2005); WT at the <i>ER</i> (AT2G26330) locus                                                                                                                                                                                   |
| <i>athb8-27</i> | ABRC (CS111153)                                                                                                                                                                                                                                               |
| SHR::miR165a    | Transcriptional fusion of <i>SHR</i> (AT4G37650; -2505 to -10; primers: “SHR HindIII F” and “SHR SalI R”) to miR165a (AT1G01183; -138 to +323 relative to the transcriptional start-site; primers: “SalI FWD – MiRNA 165” and “KpnI REV – MiRNA 165”)         |
| SHR::mATHB8     | (Ohashi-Ito et al., 2013)                                                                                                                                                                                                                                     |
| SHR::mATHB8:EAR | Translational fusion of SHR::mATHB8 (Ohashi-Ito et al., 2013) (primers: “SalI SHR Promoter FP” and “XhoI mATHB8 RP”) to the sequence encoding the EAR portable repressor domain (Hiratsu et al., 2003) (primers: “EAR XhoI + KpnI Forward” and “EAR Reverse”) |
| MP::ATHB8       | Transcriptional fusion of <i>MP</i> (AT1G19850; -3281 to -1; primers: “MP BamHI Fwd” and “MP KpnI Rev”) to the <i>ATHB8</i> (AT4G32880) cDNA (GeneBank accession: BT008798; ABRC: U24724;                                                                     |

+1 to +2502; primers: "ATHB8 cDNA KpnI FWD" and "ATHB8 cDNA SmaI Rev")

MP::mATHB8 Transcriptional fusion of *MP* (AT1G19850; -3281 to -1; primers: 63 "MP BamHI Fwd" and "MP KpnI Rev") to the *ATHB8* (AT4G32880) cDNA (GeneBank accession: BT008798; ABRC: U24724; +1 to +2502; primers: "ATHB8 cDNA KpnI FWD" and "ATHB8 cDNA SmaI Rev"; "ATHB8mut165FWD" and "ATHB8mut165REV")

ATHB8::nCFP (Sawchuk et al., 2007)

MP::MP:YFP Translational fusion of *MP* (AT1G19850; -3281 to +3815; primers: "MP Prom SalI Fwd" and "MP KpnI Rev-2"; "MP 3 kb SalI Fwd" and "MP 3 kb XhoI Rev") to the sequence encoding EYFP (primers: "ECFP AflIII F" and "ECFP AflIII R"); rescues the root (240/240 seedlings), vein (Figure S1), and inflorescence (160/160 plants) defects of *mp-B4149*

*mp-B4149* (Weijers et al., 2005)

RIBO::nCFP ABRC (CS23898); (Gordon et al., 2007); WT at the *ER* (AT2G26330) locus

ATHB8::nYFP (Sawchuk et al., 2007)

*mp-U55* ABRC (CS8147); (Mayer et al., 1993; Donner et al., 2009)

- mp-11* (Odat et al., 2014)
- MP::MP *MP* (AT1G19850; -3281 to +3830; primers: “MP Prom Sall Fwd” and “MP KpnI Rev-2”; “MP 3KB Sall Fwd” and “MP 3kb XhoI Rev”); rescues the root (169/176 seedlings), vein (Figure S1), and inflorescence (6/6 plants) defects of *mp-B4149*
- bdl* (Hamann et al., 1999); introgressed into Col-0
- MP::VP16:bdlΔI Transcriptional fusion of *MP* (AT1G19850; -3281 to -1; primers: “MP BamHI Fwd” and “MP KpnI Rev-1”) to a translational fusion of the sequence encoding the activation domain of the *Herpes simplex* virus protein 16 (VP16) (Sadowski et al., 1988) (primers: “VP16 NcoIF2” and “VP16 PstIR”) to a 5'- terminally deleted *bdl* (Hamann et al., 2002) (+94 to +1229; primers: “BDL PstIF” and “BDL BamHIR”; “BDL mut F1”, “BDL mut F2”, “BDL mut F3”, “BDL mut F4”, “BDL PstIF”, and “BDL MfeI mut R”; “BDLd1 PstI F” and “BDL BAMHI R”)
- iaa12-1* ABRC (CS25213); (Overvoorde et al., 2005)
- tpl-1* ABRC (CS65909); (Long et al., 2002)
- MP::MPΔPB1:GR Translational fusion of *MP* (AT1G19850; -3427 to +2388; primers: “MP Sall Forward – Primer # 2” and “MP EcoRI Reverse”) to the sequence encoding a fragment of the rat glucocorticoid receptor (GR) (Aoyama and Chua, 1997)

(primers: “SpeI GR Forward” and “SacII + KpnI (Internal) GR Reverse”)

ATHB8::nQFP Transcriptional fusion of *ATHB8* (AT4G32880; -2070 to -1; primers: “SalI 2KB ATHB8 Promoter Forward” and “ApaI 2KB ATHB8 Promoter Reverse”) to the sequence encoding 2xmTQ2-N7 (primers: “ApaI 2xmTurquoise Forward” and “KpnI 2xmTFP Reverse”)

R2D2 (Liao et al., 2015)

[TGTCTG]::nYFP (Donner et al., 2009)

[TAGCTG]::nYFP (Donner et al., 2009)

[TGTCAG]::nYFP Transcriptional fusion of *ATHB8* (AT4G32880; -953 to -1; primers: “1NagARE” and “Athb8 R-5”) to the sequence encoding HTA6:EYFP (Zhang et al., 2005)

[TGTCTG]::nYFP Transcriptional fusion of *ATHB8* (AT4G32880; -953 to -1; primers: “1NcARE” and “Athb8 R-5”) to the sequence encoding HTA6:EYFP (Zhang et al., 2005)

#### SUPPLEMENTAL REFERENCES

Aoyama T, Chua NH. 1997. A glucocorticoid-mediated transcriptional induction system in transgenic plants. *Plant J* **11**: 605–612.

Donner TJ, Sherr I, Scarpella E. 2009. Regulation of preprocambial cell state acquisition by auxin signaling in Arabidopsis leaves.

*Development* **136**: 3235–3246.

- Gordon SP, Heisler MG, Reddy GV, Ohno C, Das P, Meyerowitz EM. 2007. Pattern formation during de novo assembly of the Arabidopsis shoot meristem. *Development* **134**: 3539–3548.
- Hamann T, Mayer U, Jurgens G. 1999. The auxin-insensitive bodenlos mutation affects primary root formation and apical-basal patterning in the Arabidopsis embryo. *Development* **126**: 1387–1395.
- Hamann T, Benkova E, Baurle I, Kientz M, Jurgens G. 2002. The Arabidopsis BODENLOS gene encodes an auxin response protein inhibiting MONOPTEROS-mediated embryo patterning. *Genes & Development* **16**: 1610–1615.
- Hiratsu K, Matsui K, Koyama T, Ohme-Takagi M. 2003. Dominant repression of target genes by chimeric repressors that include the EAR motif, a repression domain, in Arabidopsis. *Plant J* **34**: 733–739.
- Liao CY, Smet W, Brunoud G, Yoshida S, Vernoux T, Weijers D. 2015. Reporters for sensitive and quantitative measurement of auxin response. *Nat Methods* **12**: 207–10, 2 p following 210.
- Long JA, Woody S, Poethig S, Meyerowitz EM, Barton MK. 2002. Transformation of shoots into roots in Arabidopsis embryos mutant at the TOPLESS locus. *Development* **129**: 2797–2806.
- Mayer U, Buttner G, Jurgens G. 1993. Apical-basal pattern formation in the Arabidopsis embryo: studies on the role of the gnom gene. *Development* **117**: 149–162.
- Odat O, Gardiner J, Sawchuk MG, Verna C, Donner TJ, Scarpella E. 2014. Characterization of an allelic series in the MONOPTEROS gene of Arabidopsis. *Genesis* **52**: 127–133.
- Ohashi-Ito K, Oguchi M, Kojima M, Sakakibara H, Fukuda H. 2013. Auxin-associated initiation of vascular cell differentiation by LONESOME HIGHWAY. *Development* **140**: 765–769.
- Overvoorde PJ, Okushima Y, Alonso JM, Chan A, Chang C, Ecker JR, Hughes B, Liu A, Onodera C, Quach H, Smith A, Yu G, Theologis A. 2005. Functional genomic analysis of the AUXIN/INDOLE-3-ACETIC ACID gene family members in Arabidopsis thaliana. *Plant Cell* **17**: 3282–3300.

- Prigge MJ, Otsuga D, Alonso JM, Ecker JR, Drews GN, Clark SE. 2005. Class III homeodomain-leucine zipper gene family members have overlapping, antagonistic, and distinct roles in Arabidopsis development. *Plant Cell* **17**: 61–76.
- Sadowski I, Ma J, Triezenberg S, Ptashne M. 1988. GAL4-VP16 is an unusually potent transcriptional activator. *Nature* **335**: 563–564.
- Sawchuk MG, Head P, Donner TJ, Scarpella E. 2007. Time-lapse imaging of Arabidopsis leaf development shows dynamic patterns of procambium formation. *New Phytol* **176**: 560–571.
- Weijers D, Benkova E, Jager KE, Schlereth A, Hamann T, Kientz M, Wilmoth JC, Reed JW, Jurgens G. 2005. Developmental specificity of auxin response by pairs of ARF and Aux/IAA transcriptional regulators. *Embo J* **24**: 1874–1885.
- Zhang C, Gong FC, Lambert GM, Galbraith DW. 2005. Cell type-specific characterization of nuclear DNA contents within complex tissues and organs. *Plant Methods* **1**: 7.

Table S2. Genotyping Strategies

| LINE            | STRATEGY                                                                                             |
|-----------------|------------------------------------------------------------------------------------------------------|
| <i>athb8-11</i> | ATHB8: "Athb8 0.5" and "athb8attB2R"; <i>athb8-11</i> : "athb8 -5944" and "PD991- RB"                |
| <i>athb8-27</i> | ATHB8: "athb8-27 RP" and "athb8-27 LP"; <i>athb8-27</i> : "athb8-27 RP" and "Spm32"                  |
| <i>mp-B4149</i> | "MP 1498-s" and "MP2082-AS"; <i>MseI</i>                                                             |
| <i>mp-U55</i>   | "MP Seq 2061" and "U55 Geno Rev"; <i>SmlI</i>                                                        |
| <i>mp-11</i>    | MP: "Sail_1265_Fo6LP" and "Sail_1265_Fo6RP"; <i>mp-11</i> : "LB3" and "Sail_1265_Fo6RP"              |
| <i>bdl</i>      | "bdl geno F" and "bdl geno R"; <i>HaeIII</i>                                                         |
| <i>iaa12-1</i>  | <i>IAA12</i> : "SALK_138684 LP" and "SALK_138684 RP"; <i>iaa12-1</i> : "LBb1.3" and "SALK_138684 RP" |
| <i>tpl-1</i>    | "tpl Caps Genotyping Forward" and "tpl Caps Genotyping Reverse"; <i>NcoI</i>                         |

Table S3. Oligonucleotide Sequences

| NAME                    | SEQUENCE (5' TO 3')                                   |
|-------------------------|-------------------------------------------------------|
| SHR HindIII F           | GAGAAGCTTGACAAAGAAGCAGAGCGTGG                         |
| SHR SalI R              | TGGGTCGACTTAATGAATAAGAAAATGAATAGAAGA<br>AAGGG         |
| SalI FWD – MiRNA 165    | ATTGTCGACCCACTCATCATCCCTCATC                          |
| KpnI REV – MiRNA 165    | AGCGGTACCCTTATAGAAAATACTTCGTTAGCTTG                   |
| SalI SHR Promoter FP    | GGGGTCGACACATAAAACCAGTAGACAT                          |
| XhoI mATHB8 RP          | GGGCTCGAGTATAAAAAGACCAGTTGAGG                         |
| EAR XhoI + KpnI Forward | TCGAGCTAGATCTGGATCTAGAACTCCGTTTGGGTTT<br>CGCTTAAGGTAC |
| EAR Reverse             | CTTAAGCGAAACCCAAACGGAGTTCTAGATCCAGAT<br>CATGC         |
| MP BamHI Fwd            | AAGGGATCCTCCGGGTTAATCAGTATTATTAC                      |
| MP KpnI Rev             | ACAGGTACCACAGAGAGATTTTTCAATGTTCTG                     |
| ATHB8 cDNA KpnI FWD     | GTCGGTACCATGGGAGGAGGAAGCAATAATAG                      |
| ATHB8 cDNA SmaI Rev     | ATGCCCGGATCATATAAAAGACCAGTTGAGG                       |
| ATHB8mut165FWD          | ATAGGAATCGTTGCTATTTCTC                                |



ATHB8mut165REV GGAATCTGGTCCAGGCTTCATC  
 MP Prom SalI Fwd CCCGTCGACGTATATATAAACAATACCACCTTATAAC  
 MP KpnI Rev-2 CATGGTACCTGCAGAATTAGCATACCACAC  
 MP 3 kb SalI Fwd TCTGTCGACTCCGGGTTAATCAGTATTATTAC  
 MP 3 kb XhoI Rev ATTCTCGAGTTAAGAGTTAAGACCACCTCC  
 ECFP AflII F TTAAGGTGAGCAAGGGCGACGAGC  
 ECFP AflII R AGACTTAAGATTGTACAGCTCGTCCATGCC  
 VP16 NcoIF2 TTACCATGGCCCCCGACCGATGTC  
 VP16 PstIR TTTCTGCAGCCCCACCGTACTCGTCAATTC  
 BDL PstIF ATACTGCAGCTCGTGGTGTGTCAGAATTGGAC  
 BDL BamHIR TACGGATCCACTAAACTGGGTTGTTTCTTTGTC  
 BDL mut F1 AATCTCCGGCGGAGAGTGTTAGAGAATTGGG  
 BDL mut F2 GTGGGTAAAAGTAATCTTCCGGCGGAGAGTG  
 BDL mut F3 GTGTCAGAATTGGAGGTGGGTAAAAGTAATCTTCCG  
 BDL mut F4 CGTGGTGTGTCAGAATTGGAGGTGGGGAAGAGTAATC  
 BDL MfeI mut R TAACAATTGGTGACCATCCTACCACTTGAC  
 BDLd1 PstI F AACTGCAGCGTGGAAGAGCGTGGG

|                                       |                                                         |
|---------------------------------------|---------------------------------------------------------|
| MP Sall Forward – Primer # 2          | GGGGTCGACCGGATTCGTGATCTTCGTATCCCAT                      |
| MP EcoRI Reverse                      | ATTGAATTCGGTTCGGACGCGGGGTGTCGCAATT                      |
| SpeI GR Forward                       | GGGACTAGTGGAGAAGCTCGAAAAACAAAG                          |
| SacII + KpnI (Internal) GR<br>Reverse | AATCCGCGGGGTACCTCATTGATGAAACAGAAG                       |
| Sall 2KB ATHB8 Promoter<br>Forward    | CGCGTCGACCATTATAAATATCACGACTGTA                         |
| ApaI 2KB ATHB8 Promoter<br>Reverse    | ATTGGGCCCCTTTGATCCTCTCCGATCTCT                          |
| ApaI 2xmTurquoise Forward             | ATTGGGCCCATGGTGAGCAAGGGCGAGGA                           |
| KpnI 2xmTFP Reverse                   | CGAGGTACCTCACTCTTCTTCTTGATCAGCTTCTG                     |
| 1NagARE                               | GGGGACAAGTTTGTACAAAAAAGCAGGCTTGGTTGT<br>CTCGTATTAAGGG   |
| Athb8 R-5                             | GGGGACCACTTTGTACAAGAAAGCTGGGTCTTTGAT<br>CCTCTCCGATCTCTC |
| 1NcARE                                | GGGGACAAGTTTGTACAAAAAAGCAGGCTTGGTTAC<br>CTGGTATTAAGGG   |
| athb8-27 FP                           | TGTGAAGAATGGATCCACCTC                                   |
| athb8-27 RP                           | AGTGGTCAACACCACTTGACC                                   |
| Spm32                                 | TACGAATAAGAGCGTCCATTTAGAGTG                             |

Athb8 0.5 GGGGACAAGTTTGTACAAAAAAGCAGGCTTCCTTG  
 CTCCAGAGACCAGCG

athb8attB2R GGGGACCACTTTGTACAAGAAAGCTGGGTCTTTGAT  
 CCTCTCCGATCTCTC

athb8 -594 GTTTGGCATAAAAGTGCGG

PD991- RB AAAACCTGGCGTTACCCAAC

MP 1498-s CTCTCAGCGGATAGTATGCACATCGG

MP2082-AS ATGGATGGAGCTGACGTTTGAGTTC

MP Seq 2061 CATAATGTTACTCTTCATGTACGCC

U55 Geno Rev GTGCTGTTTGTGGCGATTGG

Sail\_1265\_Fo6LP GCTTCATCTCTCAAGCAAGG

Sail\_1265\_Fo6RP TCCCAAAGTCTCACCCTCAC

LB3 TAGCATCTGAATTCATAACCAATCTCGATACAC

bdl geno F GCTCAAATCTTGATGTGAGTG

bdl geno R AGTCCACTAGCTTCTGAGGTCCC

SALK\_138684 LP GTGGGAAGAGTAATCTCCG

SALK\_138684 RP CTTCTGCTCTTGACGTCTTGG

LBb1.3 ATTTGCCGATTCGGAAC

tpl Caps Genotyping Forward GCCCTGAAAATGACATCGGT

MP PrimeTime Probe /56-FAM/CAGACTCAC/ZEN/  
AGGCCTTCTCTCGCCA/3IABKFQ/

MP PrimeTime Primer 2 TGTACCAGTGCCTCCAGAATTATC

MP PrimeTime Primer 1 TCCAGTCGCAGATCACATCAG

ACT2 PrimeTime Probe /56-FAM/ACAGCACTT/ZEN/  
GCCCAAGAGCATGA/3IABKFQ/

ACT2 PrimeTime Primer 2 TACTTCCTTTCAGGTGGTGCA

ACT2 PrimeTime Primer 1 GCTGACCGTATGAGCAAAGAAAT

## SUPPLEMENTAL FIGURE LEGENDS

### *Figure S1. MP::MP:YFP and MP::MP Functionalities in Vein Network Formation*

Dark-field illumination of cleared first leaves 14 DAG. Top right: genotype. Scale bars: 0.5 mm.

### *Figure S2. ATHB8 Expression Domains and MP and RIBO Expression Levels*

First leaves 4 DAG. Confocal laser scanning microscopy. Top right: reporter. Dashed green outline: second loop nuclei expressing ATHB8::nCFP (A,B) or ATHB8::nYFP (D,E). (B,E) Look-up table — ramp in C — visualizes expression levels. Scale bars (shown, for simplicity, only in A and D): 5  $\mu$ m.

### *Figure S3. ATHB8 Expression Domains and RIBO Expression Levels*

(A–F) First leaves 4 DAG. (A) Schematic of 4-DAG leaf — imaged in B–E — illustrating onset of *ATHB8* expression (red) — imaged in B — associated with second loop formation (Donner et al., 2009; Gardiner et al., 2011; Donner and Scarpella, 2013); increasingly darker gray: progressively older *ATHB8* expression domains. (B–E) Confocal laser scanning microscopy. (B) ATHB8::nYFP expression. (C) RIBO::nCFP expression. (D) Autofluorescence. (E) Overlay of images in B–D; red: ATHB8::nYFP expression; green: RIBO::nCFP expression; blue: autofluorescence. (F) RIBO::nCFP expression levels (mean  $\pm$  SE) in nuclei at positions -2, -1, 1, and 2 — as defined in legend to Figure 3 — relative to RIBO::nCFP expression levels in nuclei at position 0 — as defined in legend to Figure 3 — during second loop formation. Difference between RIBO::nCFP expression levels in nuclei at position -2 or -1 and RIBO::nCFP expression levels in nuclei at position 0 was significant at  $P < 0.001$  (\*\*\*) by One-Way ANOVA and Tukey's Pairwise test. Sample

population sizes: 27 leaves; position -2, 42 nuclei; position -1, 64 nuclei; position 0, 69 nuclei; position 1, 50 nuclei; position 2, 28 nuclei. Scale bars (shown, for simplicity, only in column 2): 5  $\mu\text{m}$ .

*Figure S4. mp-11 and MP::MP Effects on MP Expression*

*MP* transcript levels in *mp-11* and *MP::MP* seedlings relative to *MP* transcript levels in WT (mean  $\pm$  SE of three technical replicates for each of three biological replicates); seedlings 4 DAG; RT-qPCR. Difference between *mp-11* and WT, and between *MP::MP* and WT was significant at  $P < 0.001$  (\*\*\*) by *F*-test and *t*-test with Bonferroni correction.

*Figure S5. Summary and Interpretation.*

A three-gene incoherent type-I feedforward loop (Mangan and Alon, 2003) activates *ATHB8* expression in narrow preprocambial stripes and leads to vein network formation. *MP* receives the auxin input and activates expression of intermediate-loop *AUX/IAA* genes like *BDL/IAA12*. Both *MP* and *AUX/IAA* genes jointly regulate expression of the stripe gene *ATHB8*, which converts the auxin input into vein-network formation output. Arrows indicate positive effects; blunt-ended lines indicate negative effects.

SUPPLEMENTAL FIGURES

Figure S1

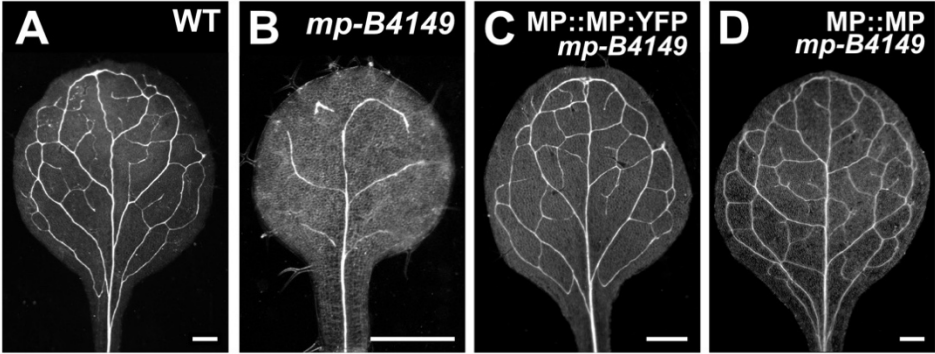

Figure S2

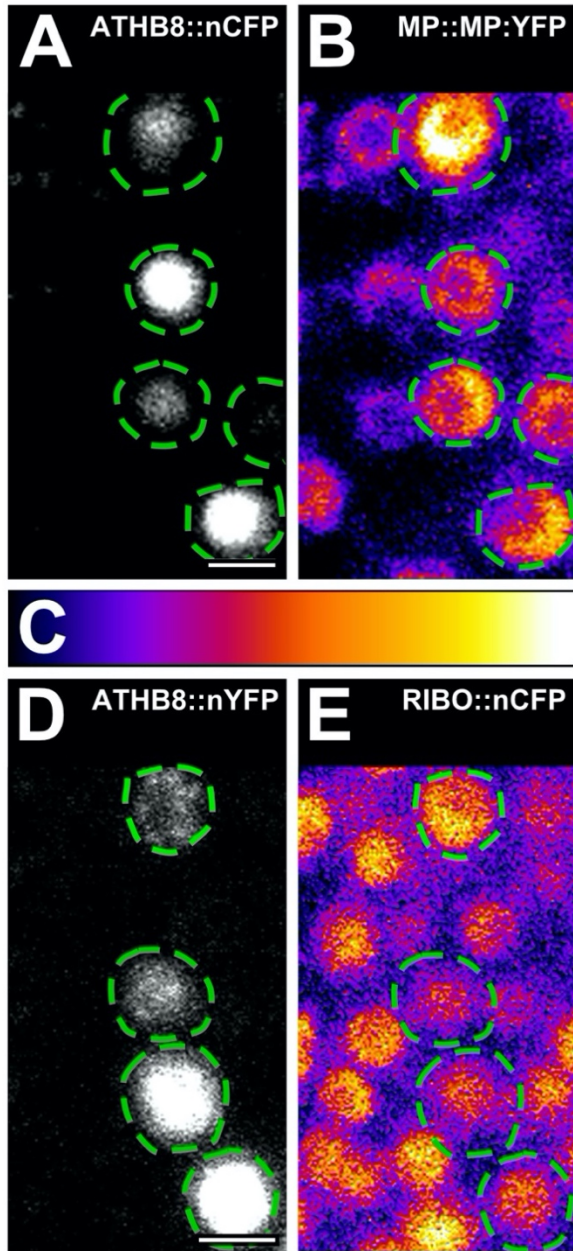



Figure S3

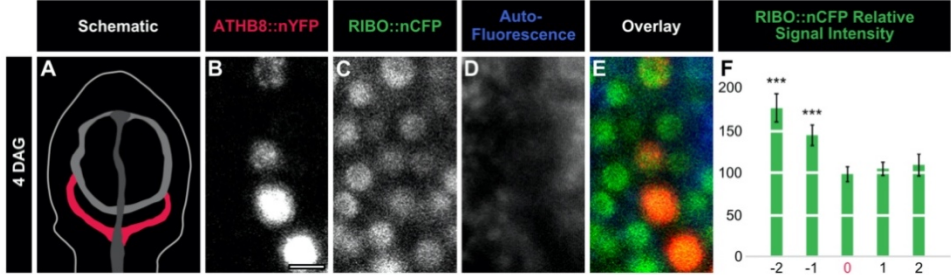

Figure S4

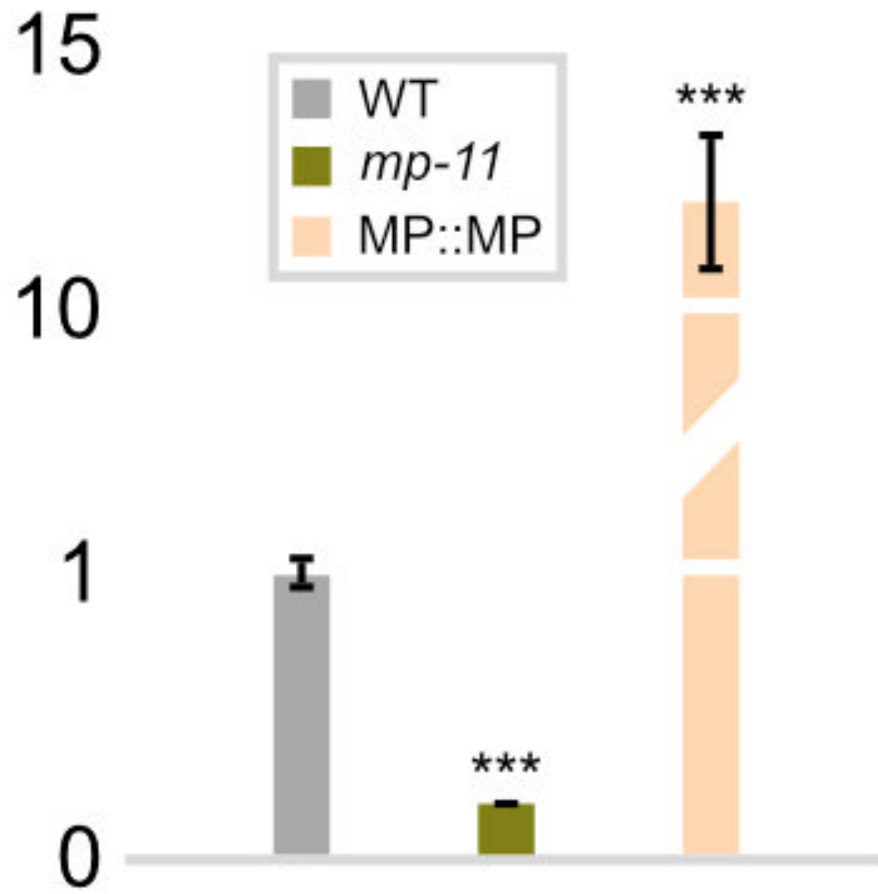

Figure S5

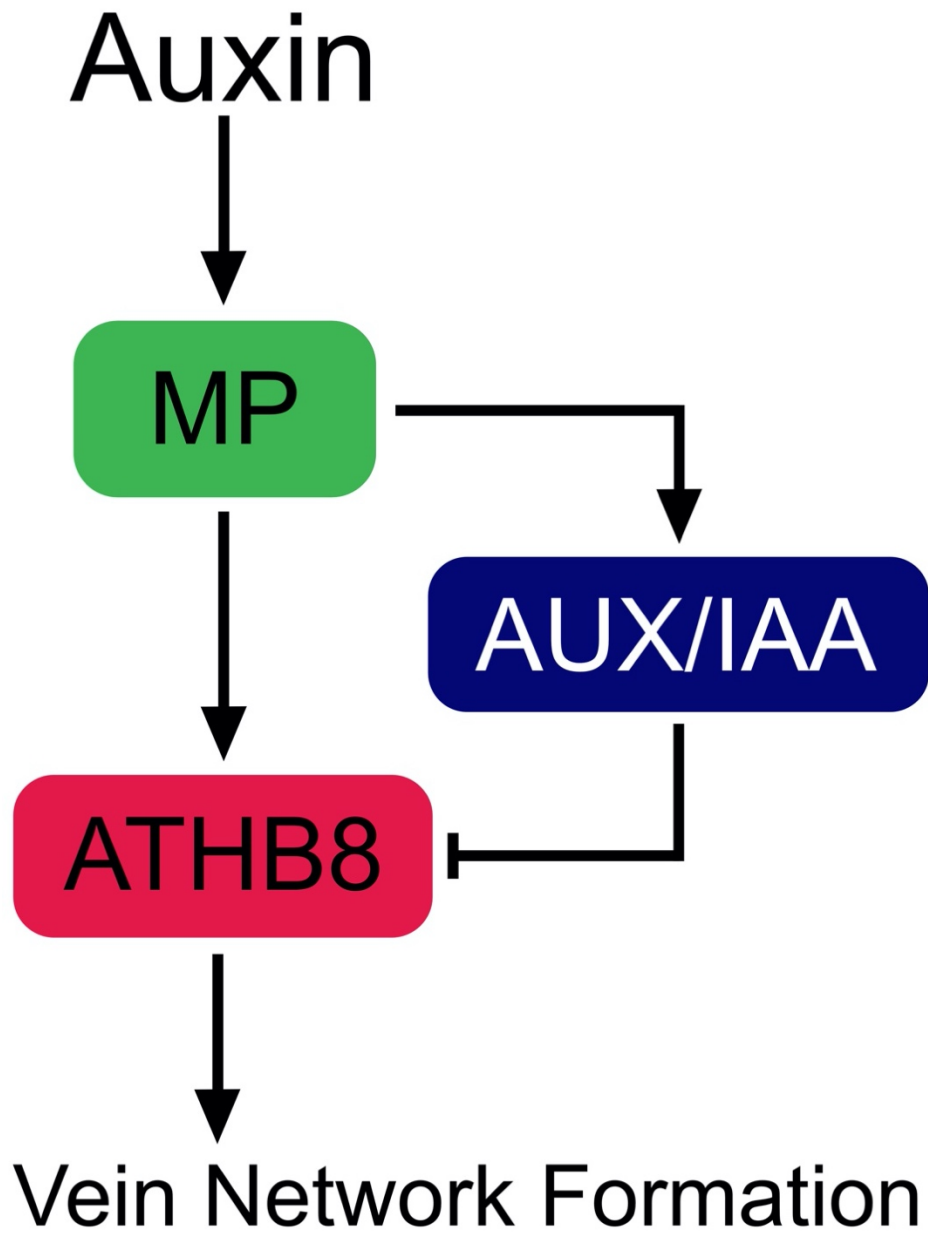

Supplement: Supplementary file [file media-1.pdf]
